# Supplementary material
Source: PubMed Central journal article supplement (PMC7546443)

Appendix Figure 1. Differential Association of Tax on 30-Day Smoking Participation Among 12<sup>th</sup> Graders, by Parental Education, Monitoring the Future, 2005-2016.

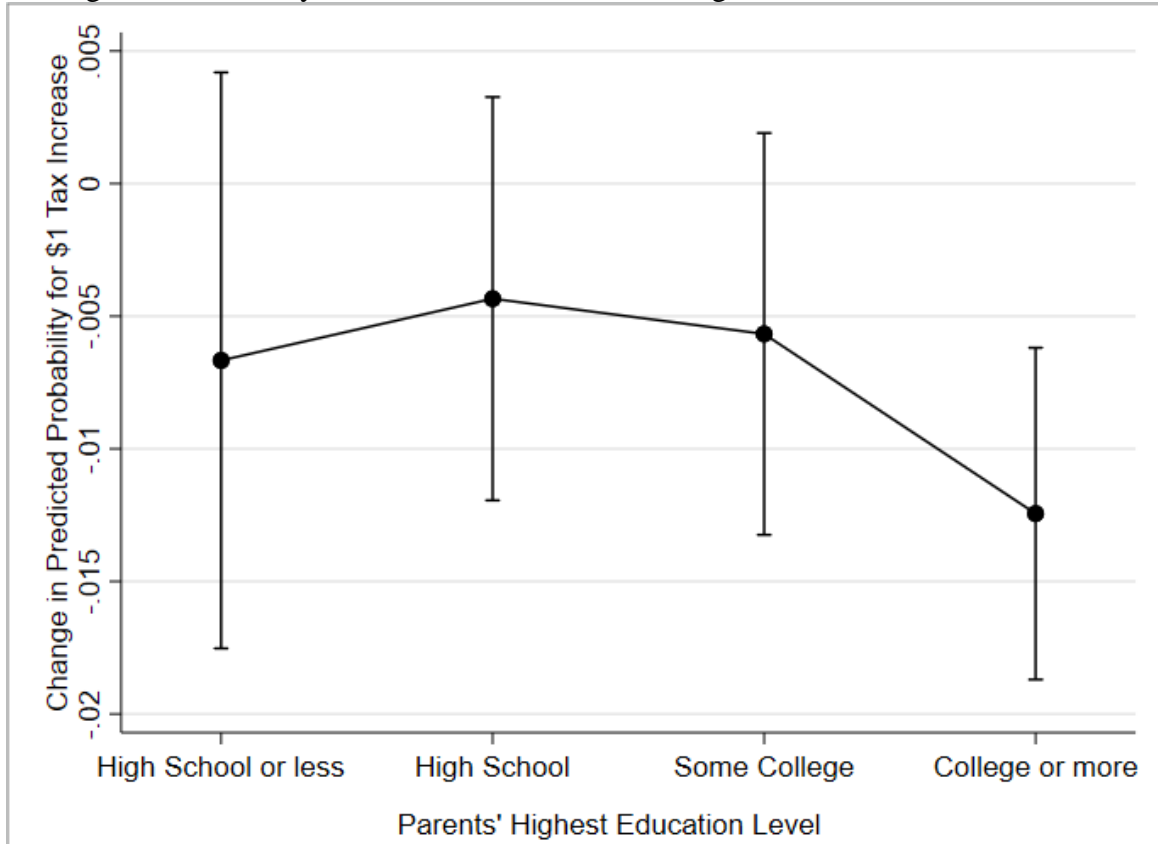

Supplement: NIHMS1627309-supplement-Supp1.pdf [file NIHMS1627309-supplement-Supp1.pdf]
