# Supplementary material
Source: PubMed Central journal article supplement (PMC7546443)
Supplement: NIHMS1627309-supplement-Supp2.pdf [file NIHMS1627309-supplement-Supp2.pdf]

Appendix Table 1. Weighted Descriptive Statistics for 8th, 10th, and 12th Graders in First Cigarette and Daily Initiation Samples, Monitoring the Future Data, 2005-2016.

| Variables                                            | Population of First Cigarette Smokers<br>in Current Grade (First Cigarette<br>Analytic Sample) |                   |                   | Population of Daily Initiation<br>Smokers in Current Grade (Daily<br>Smoking Initiation Analytic<br>Sample) |                   |                   |
|------------------------------------------------------|------------------------------------------------------------------------------------------------|-------------------|-------------------|-------------------------------------------------------------------------------------------------------------|-------------------|-------------------|
|                                                      | Grade 8<br>wt. %                                                                               | Grade 10<br>wt. % | Grade 12<br>wt. % | Grade 8<br>wt. %                                                                                            | Grade 10<br>wt. % | Grade 12<br>wt. % |
| <b>Gender</b>                                        |                                                                                                |                   |                   |                                                                                                             |                   |                   |
| <i>Female</i>                                        | 49%                                                                                            | 49%               | 47%               | 51%                                                                                                         | 50%               | 49%               |
| <i>Male</i>                                          | 47%                                                                                            | 47%               | 45%               | 47%                                                                                                         | 48%               | 46%               |
| <i>Missing</i>                                       | 4%                                                                                             | 3%                | 8%                | 3%                                                                                                          | 2%                | 5%                |
| <b>Race/Ethnicity</b>                                |                                                                                                |                   |                   |                                                                                                             |                   |                   |
| <i>Non-Hispanic White</i>                            | 50%                                                                                            | 56%               | 55%               | 53%                                                                                                         | 59%               | 58%               |
| <i>Non-Hispanic Black</i>                            | 13%                                                                                            | 12%               | 12%               | 12%                                                                                                         | 11%               | 12%               |
| <i>Hispanic</i>                                      | 18%                                                                                            | 14%               | 15%               | 17%                                                                                                         | 14%               | 14%               |
| <i>Non-Hispanic Asian</i>                            | 5%                                                                                             | 5%                | 4%                | 4%                                                                                                          | 4%                | 4%                |
| <i>Non-Hispanic Other</i>                            | 11%                                                                                            | 10%               | 8%                | 11%                                                                                                         | 10%               | 9%                |
| <i>Missing</i>                                       | 4%                                                                                             | 3%                | 5%                | 2%                                                                                                          | 2%                | 3%                |
| <b>Education, Parents' Highest</b>                   |                                                                                                |                   |                   |                                                                                                             |                   |                   |
| <i>Less than High School</i>                         | 7%                                                                                             | 6%                | 8%                | 7%                                                                                                          | 7%                | 8%                |
| <i>High School</i>                                   | 15%                                                                                            | 15%               | 17%               | 16%                                                                                                         | 16%               | 18%               |
| <i>Some College</i>                                  | 13%                                                                                            | 16%               | 19%               | 14%                                                                                                         | 17%               | 19%               |
| <i>College or Greater</i>                            | 52%                                                                                            | 55%               | 48%               | 53%                                                                                                         | 55%               | 49%               |
| <i>Missing</i>                                       | 13%                                                                                            | 8%                | 8%                | 10%                                                                                                         | 6%                | 6%                |
| <b>College Plans (Grade 12)</b>                      |                                                                                                |                   |                   |                                                                                                             |                   |                   |
| <i>No, Probably/Definitely</i>                       |                                                                                                |                   | 15%               |                                                                                                             |                   | 15%               |
| <i>Yes, Probably</i>                                 |                                                                                                |                   | 20%               |                                                                                                             |                   | 21%               |
| <i>Yes, Definitely</i>                               |                                                                                                |                   | 56%               |                                                                                                             |                   | 58%               |
| <i>Missing</i>                                       |                                                                                                |                   | 9%                |                                                                                                             |                   | 6%                |
| <b>Living Arrangement</b>                            |                                                                                                |                   |                   |                                                                                                             |                   |                   |
| <i>Neither Mother or Father in<br/>Household</i>     | 3%                                                                                             | 3%                | 6%                | 3%                                                                                                          | 3%                | 6%                |
| <i>Lives with Father</i>                             | 3%                                                                                             | 3%                | 5%                | 3%                                                                                                          | 3%                | 5%                |
| <i>Lives with Mother</i>                             | 17%                                                                                            | 16%               | 21%               | 18%                                                                                                         | 17%               | 21%               |
| <i>Lives with Father and Mother</i>                  | 73%                                                                                            | 75%               | 64%               | 74%                                                                                                         | 75%               | 66%               |
| <i>Missing</i>                                       | 3%                                                                                             | 2%                | 5%                | 1%                                                                                                          | 1%                | 3%                |
| <b>Employment, Mother's Current<br/>(Grade 8/10)</b> |                                                                                                |                   |                   |                                                                                                             |                   |                   |
| <i>Not Employed</i>                                  | 21%                                                                                            | 20%               |                   | 21%                                                                                                         | 20%               |                   |
| <i>Part Time</i>                                     | 19%                                                                                            | 17%               |                   | 19%                                                                                                         | 17%               |                   |
| <i>Full Time</i>                                     | 57%                                                                                            | 60%               |                   | 58%                                                                                                         | 62%               |                   |
| <i>Missing</i>                                       | 4%                                                                                             | 3%                |                   | 2%                                                                                                          | 1%                |                   |
| <b>Employment, Mother's Past<br/>(Grade 12)</b>      |                                                                                                |                   |                   |                                                                                                             |                   |                   |
| <i>None</i>                                          |                                                                                                |                   | 13%               |                                                                                                             |                   | 13%               |
| <i>Sometimes</i>                                     |                                                                                                |                   | 18%               |                                                                                                             |                   | 18%               |
| <i>Most of Time</i>                                  |                                                                                                |                   | 17%               |                                                                                                             |                   | 17%               |

|                                                                         |                       |                       |                       |                       |                       |                       |     |
|-------------------------------------------------------------------------|-----------------------|-----------------------|-----------------------|-----------------------|-----------------------|-----------------------|-----|
| <i>All the Time</i>                                                     |                       |                       |                       | 46%                   |                       |                       | 48% |
| <i>Missing</i>                                                          |                       |                       |                       | 6%                    |                       |                       | 3%  |
| <b>High School Program</b>                                              |                       |                       |                       |                       |                       |                       |     |
| <i>College Prep.</i>                                                    | 35%                   | 50%                   | 50%                   | 36%                   | 49%                   | 51%                   |     |
| <i>General</i>                                                          | 16%                   | 23%                   | 31%                   | 17%                   | 24%                   | 32%                   |     |
| <i>Vocational/Technical</i>                                             | 4%                    | 3%                    | 5%                    | 4%                    | 4%                    | 4%                    |     |
| <i>Other/Don't Know</i>                                                 | 40%                   | 21%                   | 9%                    | 41%                   | 22%                   | 9%                    |     |
| <i>Missing</i>                                                          | 5%                    | 3%                    | 7%                    | 2%                    | 1%                    | 4%                    |     |
| <b>Census Region</b>                                                    |                       |                       |                       |                       |                       |                       |     |
| <i>Northeast</i>                                                        | 18%                   | 21%                   | 18%                   | 16%                   | 19%                   | 18%                   |     |
| <i>Midwest</i>                                                          | 21%                   | 24%                   | 23%                   | 23%                   | 25%                   | 23%                   |     |
| <i>South</i>                                                            | 37%                   | 32%                   | 36%                   | 38%                   | 32%                   | 36%                   |     |
| <i>West</i>                                                             | 23%                   | 24%                   | 22%                   | 23%                   | 24%                   | 23%                   |     |
| <b>Smoking First Cigarette (in current grade)</b>                       |                       |                       |                       |                       |                       |                       |     |
| <i>No</i>                                                               | 83%                   | 85%                   | 30%                   |                       |                       |                       |     |
| <i>Yes</i>                                                              | 2%                    | 4%                    | 2%                    |                       |                       |                       |     |
| <i>Missing</i>                                                          |                       |                       | 10%                   |                       |                       |                       |     |
| <i>Not asked</i>                                                        | 15%                   | 11%                   | 58%                   |                       |                       |                       |     |
| <b>Initiation to Daily Smoking (in current grade)</b>                   |                       |                       |                       |                       |                       |                       |     |
| <i>No</i>                                                               |                       |                       |                       | 98%                   | 98%                   | 41%                   |     |
| <i>Yes</i>                                                              |                       |                       |                       | 2%                    | 2%                    | 1%                    |     |
| <i>Missing</i>                                                          |                       |                       |                       | 0%                    | 0%                    | 57%                   |     |
| <b>State tax (mean \$ (SE), range)</b>                                  | 1.4 (1.0), 0.1-4.7    | 1.4 (0.9), 0.1-4.7    | 1.4 (1.0), 0.1-4.7    | 1.4 (0.9), 0.1-4.7    | 1.4 (0.9), 0.1-4.7    | 1.4 (1.0), 0.1-4.7    |     |
| <b>State price (mean \$ (SE), range)</b>                                | 5.8 (1.4), 3.6-10.5   | 5.8 (1.3), 3.6-10.5   | 5.8 (1.4), 3.6-10.5   | 5.7 (1.3), 3.6-10.5   | 5.7 (1.3), 3.6-10.5   | 5.8 (1.4), 3.6-10.5   |     |
| <b>Smoke-free workplace law county coverage (mean %, (SE), range)</b>   | 0.5 (0.5), 0.0-1.0    | 0.5 (0.5), 0.0-1.0    | 0.5 (0.5), 0.0-1.0    | 0.5 (0.5), 0.0-1.0    | 0.5 (0.5), 0.0-1.0    | 0.5 (0.5), 0.0-1.0    |     |
| <b>Smoke-free hospitality law county coverage (mean %, (SE), range)</b> | 0.6 (0.5), 0.0-1.0    | 0.7 (0.5), 0.0-1.0    | 0.6 (0.5), 0.0-1.0    | 0.6 (0.5), 0.0-1.0    | 0.7 (0.5), 0.0-1.0    | 0.6 (0.5), 0.0-1.0    |     |
| <b>State Unemployment (mean %, (SE), range)</b>                         | 0.1 (0.0), 0.0-0.1    | 0.1 (0.0), 0.0-0.1    | 0.1 (0.0), 0.0-0.1    | 0.1 (0.0), 0.0-0.1    | 0.1 (0.0), 0.0-0.1    | 0.1 (0.0), 0.0-0.1    |     |
| <b>State Poverty (mean %, (SE), range)</b>                              | 0.1 (0.0), 0.1-0.2    | 0.1 (0.0), 0.1-0.2    | 0.1 (0.0), 0.1-0.2    | 0.1 (0.0), 0.1-0.2    | 0.1 (0.0), 0.1-0.2    | 0.1 (0.0), 0.1-0.2    |     |
| <b>State bar smoking opposition (mean %, (SE), range)</b>               | 0.5 (0.1), 0.3-0.7    | 0.5 (0.1), 0.3-0.7    | 0.5 (0.1), 0.3-0.7    | 0.5 (0.1), 0.3-0.7    | 0.5 (0.1), 0.3-0.7    | 0.5 (0.1), 0.3-0.7    |     |
| <b>State % with smoke-free home rules (mean %, (SE), range)</b>         | 0.8 (0.1), 0.6-0.9    | 0.8 (0.1), 0.6-1.0    | 0.8 (0.1), 0.6-0.9    | 0.8 (0.1), 0.6-0.9    | 0.8 (0.1), 0.6-1.0    | 0.8 (0.1), 0.6-0.9    |     |
| <b>State % Black (mean %, (SE), range)</b>                              | 0.1 (0.1), 0.0-0.5    | 0.1 (0.1), 0.0-0.5    | 0.1 (0.1), 0.0-0.5    | 0.1 (0.1), 0.0-0.5    | 0.1 (0.1), 0.0-0.5    | 0.1 (0.1), 0.0-0.5    |     |
| <b>State % Hispanic (mean %, (SE), range)</b>                           | 0.2 (0.1), 0.0-0.5    | 0.2 (0.1), 0.0-0.5    | 0.2 (0.1), 0.0-0.5    | 0.2 (0.1), 0.0-0.5    | 0.2 (0.1), 0.0-0.5    | 0.2 (0.1), 0.0-0.5    |     |
| <b>State % HS grad (age 25+) (mean %, (SE), range)</b>                  | 85.7 (3.5), 77.8-93.5 | 85.7 (3.6), 78.4-93.5 | 85.4 (3.5), 77.8-93.5 | 85.7 (3.5), 77.8-93.5 | 85.6 (3.6), 78.4-93.5 | 85.5 (3.5), 77.8-93.5 |     |
| <b>State % college grad (age 25+) (mean %, (SE), range)</b>             | 28.5 (4.7), 16.6-56.7 | 28.7 (4.5), 16.6-55.0 | 28.4 (4.6), 17.3-56.7 | 28.3 (4.7), 16.6-56.7 | 28.5 (4.5), 16.6-55.0 | 28.3 (4.6), 17.3-56.7 |     |
| <b>Unweighted N</b>                                                     | <b>167019</b>         | <b>141644</b>         | <b>146425</b>         | <b>164540</b>         | <b>159091</b>         | <b>149350</b>         |     |

**Abbreviations:** Standard error (SE), weighted (wt)
