# Supplementary material
Source: PubMed Central journal article supplement (PMC7546443)
Supplement: NIHMS1627309-supplement-Supp3.pdf [file NIHMS1627309-supplement-Supp3.pdf]

Appendix Table 2. Weighted Descriptive Statistics for all 8th, 10th, and 12th Graders in Multiply Imputed Sample, Monitoring the Future Data, 2005-2016.

| Variables                                        | Population of First Smokers in Current Grade (First Cigarette Analytic Sample) |                   |                   | Population of Daily Initiation Smokers in Current Grade (Daily Smoking Initiation Analytic Sample) |                   |                   |
|--------------------------------------------------|--------------------------------------------------------------------------------|-------------------|-------------------|----------------------------------------------------------------------------------------------------|-------------------|-------------------|
|                                                  | Grade 8<br>wt. %                                                               | Grade 10<br>wt. % | Grade 12<br>wt. % | Grade 8<br>wt. %                                                                                   | Grade 10<br>wt. % | Grade 12<br>wt. % |
| <b>Gender</b>                                    |                                                                                |                   |                   |                                                                                                    |                   |                   |
| <i>Female</i>                                    | 51%                                                                            | 51%               | 53%               | 51%                                                                                                | 51%               | 52%               |
| <i>Male</i>                                      | 49%                                                                            | 49%               | 47%               | 49%                                                                                                | 49%               | 48%               |
| <b>Race/Ethnicity</b>                            |                                                                                |                   |                   |                                                                                                    |                   |                   |
| <i>Non-Hispanic White</i>                        | 52%                                                                            | 58%               | 56%               | 52%                                                                                                | 58%               | 58%               |
| <i>Non-Hispanic Black</i>                        | 13%                                                                            | 12%               | 14%               | 13%                                                                                                | 12%               | 13%               |
| <i>Hispanic</i>                                  | 18%                                                                            | 14%               | 15%               | 18%                                                                                                | 15%               | 16%               |
| <i>Non-Hispanic Asian</i>                        | 5%                                                                             | 5%                | 5%                | 4%                                                                                                 | 4%                | 5%                |
| <i>Non-Hispanic Other</i>                        | 11%                                                                            | 10%               | 9%                | 12%                                                                                                | 10%               | 9%                |
| <b>Education, Parents' Highest</b>               |                                                                                |                   |                   |                                                                                                    |                   |                   |
| <i>Less than High School</i>                     | 8%                                                                             | 7%                | 9%                | 9%                                                                                                 | 8%                | 9%                |
| <i>High School</i>                               | 18%                                                                            | 16%               | 18%               | 18%                                                                                                | 17%               | 19%               |
| <i>Some College</i>                              | 15%                                                                            | 17%               | 20%               | 16%                                                                                                | 18%               | 21%               |
| <i>College or Greater</i>                        | 59%                                                                            | 60%               | 53%               | 57%                                                                                                | 57%               | 51%               |
| <b>College Plans (Grade 12)</b>                  |                                                                                |                   |                   |                                                                                                    |                   |                   |
| <i>No, Probably/Definitely</i>                   |                                                                                |                   | 14%               |                                                                                                    |                   | 16%               |
| <i>Yes, Probably</i>                             |                                                                                |                   | 21%               |                                                                                                    |                   | 23%               |
| <i>Yes, Definitely</i>                           |                                                                                |                   | 65%               |                                                                                                    |                   | 62%               |
| <i>Missing</i>                                   |                                                                                |                   |                   |                                                                                                    |                   |                   |
| <b>Living Arrangement</b>                        |                                                                                |                   |                   |                                                                                                    |                   |                   |
| <i>Neither Mother or Father in Household</i>     | 3%                                                                             | 3%                | 5%                | 4%                                                                                                 | 4%                | 6%                |
| <i>Lives with Father</i>                         | 3%                                                                             | 3%                | 4%                | 4%                                                                                                 | 4%                | 5%                |
| <i>Lives with Mother</i>                         | 18%                                                                            | 17%               | 21%               | 19%                                                                                                | 18%               | 22%               |
| <i>Lives with Father and Mother</i>              | 76%                                                                            | 77%               | 70%               | 74%                                                                                                | 75%               | 68%               |
| <b>Employment, Mother's Current (Grade 8/10)</b> |                                                                                |                   |                   |                                                                                                    |                   |                   |
| <i>Not Employed</i>                              | 21%                                                                            | 21%               |                   | 22%                                                                                                | 21%               |                   |
| <i>Part Time</i>                                 | 20%                                                                            | 17%               |                   | 19%                                                                                                | 17%               |                   |
| <i>Full Time</i>                                 | 59%                                                                            | 62%               |                   | 59%                                                                                                | 62%               |                   |
| <b>Employment, Mother's Past (Grade 12)</b>      |                                                                                |                   |                   |                                                                                                    |                   |                   |
| <i>None</i>                                      |                                                                                |                   | 15%               |                                                                                                    |                   | 14%               |
| <i>Sometimes</i>                                 |                                                                                |                   | 19%               |                                                                                                    |                   | 19%               |
| <i>Most of Time</i>                              |                                                                                |                   | 17%               |                                                                                                    |                   | 18%               |
| <i>All the Time</i>                              |                                                                                |                   | 48%               |                                                                                                    |                   | 49%               |
| <b>High School Program</b>                       |                                                                                |                   |                   |                                                                                                    |                   |                   |
| <i>College Prep.</i>                             | 37%                                                                            | 51%               | 56%               | 35%                                                                                                | 49%               | 54%               |
| <i>General</i>                                   | 17%                                                                            | 23%               | 31%               | 17%                                                                                                | 25%               | 32%               |
| <i>Vocational/Technical</i>                      | 4%                                                                             | 3%                | 4%                | 5%                                                                                                 | 4%                | 4%                |

|                                                                         |                         |                       |                       |                       |                       |                       |                       |
|-------------------------------------------------------------------------|-------------------------|-----------------------|-----------------------|-----------------------|-----------------------|-----------------------|-----------------------|
| <b>Census Region</b>                                                    | <i>Other/Don't Know</i> | 42%                   | 22%                   | 9%                    | 43%                   | 22%                   | 9%                    |
|                                                                         | <i>Northeast</i>        | 18%                   | 20%                   | 18%                   | 17%                   | 20%                   | 18%                   |
|                                                                         | <i>Midwest</i>          | 22%                   | 24%                   | 23%                   | 22%                   | 24%                   | 23%                   |
|                                                                         | <i>South</i>            | 37%                   | 32%                   | 36%                   | 38%                   | 33%                   | 36%                   |
|                                                                         | <i>West</i>             | 24%                   | 24%                   | 24%                   | 23%                   | 23%                   | 23%                   |
| <b>Smoking First Cigarette (in current grade)</b>                       |                         |                       |                       |                       |                       |                       |                       |
|                                                                         | <i>No</i>               | 97%                   | 96%                   | 94%                   |                       |                       |                       |
|                                                                         | <i>Yes</i>              | 3%                    | 4%                    | 6%                    |                       |                       |                       |
| <b>Initiation to Daily Smoking (in current grade)</b>                   |                         |                       |                       |                       |                       |                       |                       |
|                                                                         | <i>No</i>               |                       |                       |                       | 98%                   | 97%                   | 96%                   |
|                                                                         | <i>Yes</i>              |                       |                       |                       | 2%                    | 3%                    | 4%                    |
| <b>State tax (mean \$ (SE), range)</b>                                  |                         | 1.4 (1.0), 0.1-4.7    | 1.4 (0.9), 0.1-4.7    | 1.4 (1.0), 0.1-4.7    | 1.4 (1.0), 0.1-4.7    | 1.4 (0.9), 0.1-4.7    | 1.4 (1.0), 0.1-4.7    |
| <b>State price (mean \$ (SE), range)</b>                                |                         | 5.8 (1.4), 3.6-10.5   | 5.8 (1.3), 3.6-10.5   | 5.8 (1.4), 3.6-10.5   | 5.8 (1.4), 3.6-10.5   | 5.7 (1.3), 3.6-10.5   | 5.8 (1.4), 3.6-10.5   |
| <b>Smoke-free workplace law county coverage (mean %, (SE), range)</b>   |                         | 0.5 (0.5), 0.0-1.0    | 0.5 (0.5), 0.0-1.0    | 0.5 (0.5), 0.0-1.0    | 0.5 (0.5), 0.0-1.0    | 0.5 (0.5), 0.0-1.0    | 0.5 (0.5), 0.0-1.0    |
| <b>Smoke-free hospitality law county coverage (mean %, (SE), range)</b> |                         | 0.6 (0.5), 0.0-1.0    | 0.7 (0.5), 0.0-1.0    | 0.7 (0.5), 0.0-1.0    | 0.6 (0.5), 0.0-1.0    | 0.7 (0.5), 0.0-1.0    | 0.6 (0.5), 0.0-1.0    |
| <b>State Unemployment (mean %, (SE), range)</b>                         |                         | 0.1 (0.0), 0.0-0.1    | 0.1 (0.0), 0.0-0.1    | 0.1 (0.0), 0.0-0.1    | 0.1 (0.0), 0.0-0.1    | 0.1 (0.0), 0.0-0.1    | 0.1 (0.0), 0.0-0.1    |
| <b>State Poverty (mean %, (SE), range)</b>                              |                         | 0.1 (0.0), 0.1-0.2    | 0.1 (0.0), 0.1-0.2    | 0.1 (0.0), 0.1-0.2    | 0.1 (0.0), 0.1-0.2    | 0.1 (0.0), 0.1-0.2    | 0.1 (0.0), 0.1-0.2    |
| <b>State bar smoking opposition (mean %, (SE), range)</b>               |                         | 0.5 (0.1), 0.3-0.7    | 0.5 (0.1), 0.3-0.7    | 0.5 (0.1), 0.3-0.7    | 0.5 (0.1), 0.3-0.7    | 0.5 (0.1), 0.3-0.7    | 0.5 (0.1), 0.3-0.7    |
| <b>State % with smoke-free home rules (mean %, (SE), range)</b>         |                         | 0.8 (0.1), 0.6-0.9    | 0.8 (0.1), 0.6-1.0    | 0.8 (0.1), 0.6-0.9    | 0.8 (0.1), 0.6-0.9    | 0.8 (0.1), 0.6-1.0    | 0.8 (0.1), 0.6-0.9    |
| <b>State % Black (mean %, (SE), range)</b>                              |                         | 0.1 (0.1), 0.0-0.5    | 0.1 (0.1), 0.0-0.5    | 0.1 (0.1), 0.0-0.5    | 0.1 (0.1), 0.0-0.5    | 0.1 (0.1), 0.0-0.5    | 0.1 (0.1), 0.0-0.5    |
| <b>State % Hispanic (mean %, (SE), range)</b>                           |                         | 0.2 (0.1), 0.0-0.5    | 0.2 (0.1), 0.0-0.5    | 0.2 (0.1), 0.0-0.5    | 0.2 (0.1), 0.0-0.5    | 0.2 (0.1), 0.0-0.5    | 0.2 (0.1), 0.0-0.5    |
| <b>State % HS grad (age 25+) (mean %, (SE), range)</b>                  |                         | 85.7 (3.5), 77.8-93.5 | 85.7 (3.6), 78.4-93.5 | 85.5 (3.5), 77.8-93.5 | 85.6 (3.5), 77.8-93.5 | 85.6 (3.6), 78.4-93.5 | 85.4 (3.5), 77.8-93.5 |
| <b>State % college grad (age 25+) (mean %, (SE), range)</b>             |                         | 28.5 (4.7), 16.6-56.7 | 28.8 (4.5), 16.6-55.0 | 28.6 (4.6), 17.3-56.7 | 28.3 (4.7), 16.6-56.7 | 28.6 (4.5), 16.6-55.0 | 28.4 (4.6), 17.3-56.7 |
|                                                                         | <b>Unweighted N</b>     | <b>163427</b>         | <b>138073</b>         | <b>53933</b>          | <b>186398</b>         | <b>171541</b>         | <b>74231</b>          |

**Abbreviations:** Standard error (SE), weighted (wt)
