# Supplementary material
Source: PubMed Central journal article supplement (PMC7546443)
Supplement: NIHMS1627309-supplement-Supp4.pdf [file NIHMS1627309-supplement-Supp4.pdf]

Appendix Table 3. Unadjusted *P*-values for Joint Test of Additive Interactions Between Tax and SES, Race/Ethnicity, and Gender for Smoking Participation, Intensity, First Cigarette Initiation, and Daily Smoking Initiation for 8th, 10th, and 12th Graders, Monitoring the Future Data, 2005-2016. Results Shown are Using Imputed Data (m=10).

|                                        | 8 <sup>th</sup> graders<br><i>aP</i> | 10 <sup>th</sup> graders<br><i>aP</i> | 12 <sup>th</sup> graders<br><i>aP</i> |
|----------------------------------------|--------------------------------------|---------------------------------------|---------------------------------------|
| <b>Smoking participation</b>           |                                      |                                       |                                       |
| <i>Tax</i> × <i>Parental education</i> | 0.855                                | 0.146                                 | 0.022                                 |
| <i>Tax</i> × <i>College bound</i>      | --                                   | --                                    | <0.001 <sup>b</sup>                   |
| <i>Tax</i> × <i>Race/ethnicity</i>     | 0.074                                | 0.664                                 | 0.277                                 |
| <i>Tax</i> × <i>Gender</i>             | 0.485                                | 0.209                                 | 0.542                                 |
| <i>N mean</i>                          | 193570                               | 185943                                | 171019                                |
| <b>Conditional intensity</b>           |                                      |                                       |                                       |
| <i>Tax</i> × <i>Parental education</i> | 0.099                                | 0.080                                 | 0.886                                 |
| <i>Tax</i> × <i>College bound</i>      | --                                   | --                                    | 0.598                                 |
| <i>Tax</i> × <i>Race/ethnicity</i>     | 0.100                                | 0.033                                 | 0.093                                 |
| <i>Tax</i> × <i>Gender</i>             | 0.201                                | 0.042                                 | 0.245                                 |
| <i>N mean</i>                          | 11501                                | 20019                                 | 29667                                 |
| <b>First cigarette initiation</b>      |                                      |                                       |                                       |
| <i>Tax</i> × <i>Parental education</i> | 0.947                                | 0.335                                 | 0.499                                 |
| <i>Tax</i> × <i>College bound</i>      | --                                   | --                                    | 0.397                                 |
| <i>Tax</i> × <i>Race/ethnicity</i>     | 0.473                                | 0.903                                 | 0.173                                 |
| <i>Tax</i> × <i>Gender</i>             | 0.127                                | 0.222                                 | 0.565                                 |
| <i>N mean</i>                          | 163427                               | 138073                                | 53933                                 |
| <i>N min-max</i>                       | 163346-163512                        | 137923-138238                         | 53868-54136                           |
| <b>Daily smoking initiation</b>        |                                      |                                       |                                       |
| <i>Tax</i> × <i>Parental education</i> | 0.650                                | 0.754                                 | 0.736                                 |
| <i>Tax</i> × <i>College bound</i>      | --                                   | --                                    | 0.069                                 |
| <i>Tax</i> × <i>Race/ethnicity</i>     | 0.135                                | 0.978                                 | 0.306                                 |
| <i>Tax</i> × <i>Gender</i>             | 0.056                                | 0.967                                 | 0.980                                 |
| <i>N mean</i>                          | 186398                               | 171541                                | 74231                                 |
| <i>N min-max</i>                       | 186363-186434                        | 171442-171662                         | 74154-74326                           |

<sup>a</sup>Each interaction is estimated from a separate Poisson model (or linear model in the case of conditional intensity) with all main effects and a single interaction term between tax and either SES, race/ethnicity, or gender variable. All models controlled for covariates shown in Table 1 for each grade as well as a year indicator. Due to imputations, sample sizes varied slightly for the initiation measures.

<sup>b</sup>Indicates significance after controlling false discovery rate at 5%.
